# Supplementary material
Source: Preprints.org preprint supplement (doi:10.20944/preprints202106.0384.v2)
Supplement: Supplementary file 2 [file supplementary]

TABLE S3. Categories of genes from 3 serovars of *S. enterica* subspecies I that vary in AT 8+mer mutations<sup>1</sup>

| STM gene accession                                                                                                                 | SEEG gene accession          | SEN gene accession      | AT 8+mer Sequence variation | Common name of gene | Description of target gene | Gene function                                                                                                     |
|------------------------------------------------------------------------------------------------------------------------------------|------------------------------|-------------------------|-----------------------------|---------------------|----------------------------|-------------------------------------------------------------------------------------------------------------------|
| A. Genes of <i>S. Typhimurium</i> (STM) that vary from <i>S. Gallinarum</i> (SEEG) and/or <i>S. Enteritidis</i> (SEN)              |                              |                         |                             |                     |                            |                                                                                                                   |
| STM0105                                                                                                                            | SEEG9184_RS20395             | SEN_RS00535             | STM 1 bp sub                | yabl                | All ORFs intact            | DedA family protein                                                                                               |
| STM0212                                                                                                                            | ---                          | SEN_RS01100             | STM 1 bp sub                | unnamed             | Both ORFs intact           | MFS transporter                                                                                                   |
| STM0229                                                                                                                            | SEEG9184_RS19720             | SEN_RS01185             | SEEG, SEN 1 bp sub          | lpxB                | All ORFs intact            | Lipid-A-disaccharide synthase                                                                                     |
| STM0341                                                                                                                            | SEEG9184_RS23875             | SEN_RS01660             | SEEG 1 bp del               | unnamed             | SEEG pseudogene            | putative inner membrane protein                                                                                   |
| STM0342                                                                                                                            | SEEG9184_RS2540              | SEN_RS24170             | SEN 1 bp insert             | unnamed             | All ORFs intact            | putative periplasmic protein                                                                                      |
| STM0555                                                                                                                            | SEEG9184_RS23515             | SEN_RS24190             | SEEG, SEN 1 bp sub          | unnamed             | All pseudogenes            | pseudogene in all 3 genomes; frameshift relative to E coli ES3 putative transposase                               |
| STM0558                                                                                                                            | ---                          | SEN_RS02735             | SEN 1 bp del                | yfdH                | Both ORFs intact           | putative glycosyltransferase                                                                                      |
| STM1107_regulon                                                                                                                    | SEEG9184_RS15835_regulon     | SEN_RS05020_regulon     | STM 1 SNP del               | hpaX-regulon        | na                         | 4-hydroxyphenylacetate permease                                                                                   |
| STM1107                                                                                                                            | SEEG9184_RS15835             | SEN_RS05020             | same                        | hpaX                | All ORFs intact            | 4-hydroxyphenylacetate permease                                                                                   |
| STM1130                                                                                                                            | SEEG9184_RS15695             | ---                     | SEEG 1 bp del               | unnamed             | SEEG pseudogene            | N-acetylneuraminic acid mutarotase                                                                                |
| STM1520                                                                                                                            | SEEG9184_RS12690             | ---                     | STM 1 bp sub                | marR                | Both ORFs intact           | transcriptional regulator multiple antibiotic resistance protein MAR                                              |
| STM1550                                                                                                                            | ---                          | SEN_RS07790             | Deletion of 154 bp in SEN   | unnamed             | SEN pseudogene             | type II toxin-antitoxin system mRNA interferase toxin                                                             |
| STM1602                                                                                                                            | SEEG9184_RS13085             | ---                     | SEEG 1 bp del               | sifB                | SEEG pseudogene            | effector protein SifB                                                                                             |
| STM1635                                                                                                                            | SEEG9184_RS13270             | ---                     | STM 1 bp sub                | unnamed             | ORF intact                 | amino acid ABC transporter ATP-binding protein                                                                    |
| STM1670                                                                                                                            | SEEG9184_RS13465             | ---                     | SEEG 1 bp del               | unnamed             | ORF intact                 | HO protein                                                                                                        |
| STM1698                                                                                                                            | SEEG9184_RS13605             | ---                     | SEEG 1 bp del               | steC                | SEEG pseudogene            | secreted effector kinase SteC                                                                                     |
| STM1869                                                                                                                            | SEEG9184_RS14565             | ---                     | SEEG 1 bp del               | unnamed             | SEEG pseudogene            | HO protein                                                                                                        |
| STM1939                                                                                                                            | SEEG9184_RS15200             | ---                     | SEEG 1 bp del               | unnamed             | SEEG pseudogene            | putative glucose-6-phosphate dehydrogenase                                                                        |
| STM1941                                                                                                                            | SEEG9184_RS15210             | SEN_RS05525             | SEEG, SEN 1 bp del          | unnamed             | SEEG pseudogene            | HO protein                                                                                                        |
| STM2047                                                                                                                            | SEEG9184_RS10150             | SEN_RS10650             | STM 1 bp sub                | pduL                | All ORFs intact            | propanediol utilization protein                                                                                   |
| STM2090                                                                                                                            | SEEG9184_RS10005             | SEN_RS10870             | SEEG, SEN 1 bp sub          | rfbH                | All ORFs intact            | lipopolysaccharide biosynthesis protein; LPS side chain defect                                                    |
| STM2100                                                                                                                            | SEEG9184_RS09955             | SEN_RS10920             | SEEG, SEN 1 bp sub          | wcaL                | All ORFs intact            | colanic acid biosynthesis glycosyltransferase                                                                     |
| STM2129                                                                                                                            | SEEG9184_RS09800             | ---                     | SEEG 1 bp del               | yegB                | SEEG pseudogene            | multidrug transporter subunit MdtD                                                                                |
| STM2134                                                                                                                            | SEEG9184_RS09775             | ---                     | SEEG 1 bp del               | unnamed             | ORF intact                 | HO protein                                                                                                        |
| STM2268_regulon                                                                                                                    | bp1841830-1842036            | bp2360965-2361170       | SEN 1 SNP del               | micF-regulon        | na                         | Not annotated in SEEG:ribosomal binding site of micF in STM                                                       |
| STM2277_regulon                                                                                                                    | SEEG9184_RS09060             | ---                     | SEEG 1 SNP del              | ubiG-regulon        | na                         | 3-demethylubiquinone-9 3-methyltransferase                                                                        |
| STM3022                                                                                                                            | ---                          | SEN_RS14915             | SEN 1 bp sub                | unnamed             | ORF intact                 | transporter                                                                                                       |
| STM3166                                                                                                                            | SEEG9184_RS04980             | SEN_RS15645             | STM 1 bp del                | unnamed             | All ORFs intact            | putative cation transporter                                                                                       |
| STM3212                                                                                                                            | SEEG9184_RS04730             | ---                     | STM 1 bp sub                | mug                 | ORF intact                 | double-stranded uracil-DNA glycosylase                                                                            |
| STM3464                                                                                                                            | SEEG9184_RS01925             | ---                     | STM 1 bp del                | prkB                | ORF intact                 | putative phosphoribulokinase                                                                                      |
| STM3638                                                                                                                            | SEEG9184_RS01040             | ---                     | SEEG 1 bp del               | lpfC                | ORF intact                 | fimbrial assembly protein; SEEG9184 has 5 bp deletion                                                             |
| STM3674                                                                                                                            | SEEG9184_RS00845             | SEN_RS18190             | SEEG, SEN 1 bp sub          | lyxK                | SEEG pseudogene            | carbohydrate kinase                                                                                               |
| STM4351                                                                                                                            | ---                          | SEN_RS21445             | SEN 1 bp del                | unnamed             | ORF intact                 | arginine ABC transporter substrate-binding protein                                                                |
| B. Genes of <i>S. Typhimurium</i> (STM) with AT 8+mers but with no homolog to either <i>S. Gallinarum</i> or <i>S. Enteritidis</i> |                              |                         |                             |                     |                            |                                                                                                                   |
| STM0290                                                                                                                            | ---                          | ---                     | na                          | unnamed             | ORF intact                 | HO protein                                                                                                        |
| STM0720                                                                                                                            | ---                          | ---                     | na                          | unnamed             | ORF intact                 | putative glycosyl transferase                                                                                     |
| STM0722                                                                                                                            | ---                          | ---                     | na                          | unnamed             | ORF intact                 | ABC transporter permease                                                                                          |
| STM0723                                                                                                                            | ---                          | ---                     | na                          | unnamed             | ORF intact                 | similar to E coli ATP-binding component of putrescine transport system; sugar ABC transporter ATP-binding protein |
| STM0870                                                                                                                            | ---                          | ---                     | na                          | unnamed             | ORF intact                 | putative inner membrane protein                                                                                   |
| STM0929                                                                                                                            | ---                          | ---                     | na                          | unnamed             | ORF intact                 | Gifsy-2 prophage excisionase                                                                                      |
| STM1006                                                                                                                            | ---                          | ---                     | na                          | unnamed             | ORF intact                 | Gifsy-2 prophage protein                                                                                          |
| STM1023                                                                                                                            | ---                          | ---                     | na                          | unnamed             | ORF intact                 | Gifsy-2 prophage protein                                                                                          |
| STM1554                                                                                                                            | ---                          | ---                     | na                          | unnamed             | ORF intact                 | putative coiled-coil protein                                                                                      |
| STM2088                                                                                                                            | ---                          | ---                     | na                          | rfbX                | ORF intact                 | O-antigen transferase:LPS side chain defect if mutated; putative transporter                                      |
| STM2137                                                                                                                            | ---                          | ---                     | na                          | unnamed             | ORF intact                 | putative cytoplasmic protein                                                                                      |
| STM2584                                                                                                                            | ---                          | ---                     | na                          | gogB                | ORF intact                 | type III secretion system protein                                                                                 |
| STM2592                                                                                                                            | ---                          | ---                     | na                          | unnamed             | ORF intact                 | similar to phage tail component L                                                                                 |
| STM2609                                                                                                                            | ---                          | ---                     | na                          | unnamed             | ORF intact                 | Gifsy-1 prophage protein                                                                                          |
| STM2706                                                                                                                            | ---                          | ---                     | na                          | unnamed             | ORF intact                 | Fels-2 prophage protein; similar to tail fiber protein in phage P2                                                |
| STM2754                                                                                                                            | ---                          | ---                     | na                          | unnamed             | ORF intact                 | hexulose-6-phosphate synthase                                                                                     |
| STM2766                                                                                                                            | ---                          | ---                     | na                          | unnamed             | ORF intact                 | HO protein                                                                                                        |
| STM2902                                                                                                                            | ---                          | ---                     | na                          | unnamed             | ORF intact                 | putative cytoplasmic protein                                                                                      |
| STM4435                                                                                                                            | ---                          | ---                     | na                          | unnamed             | ORF intact                 | inosose isomerase                                                                                                 |
| STM4495                                                                                                                            | ---                          | ---                     | na                          | unnamed             | ORF intact                 | type II restriction enzyme methylase subunit                                                                      |
| STM4524                                                                                                                            | ---                          | ---                     | na                          | hsdS                | ORF intact                 | restriction endonuclease subunit S                                                                                |
| C. Genes of <i>S. Enteritidis</i> and/or <i>S. Gallinarum</i> with similar AT 8+mers but with no homolog in <i>S. Typhimurium</i>  |                              |                         |                             |                     |                            |                                                                                                                   |
| ---                                                                                                                                | SEEG9184_RS10025             | SEN_RS10850             | same                        | unnamed             | Both ORFs intact           | glycosyltransferase family 2 protein                                                                              |
| ---                                                                                                                                | SEEG9184_RS10420             | SEN_RS10400             | same                        | unnamed             | Both ORFs intact           | HO protein                                                                                                        |
| ---                                                                                                                                | SEEG9184_RS10430             | SEN_RS10390             | same                        | unnamed             | Both ORFs intact           | SLATT domain-containing protein                                                                                   |
| ---                                                                                                                                | SEEG9184_RS10595             | SEN_RS09970             | same                        | unnamed             | Both ORFs intact           | HO protein                                                                                                        |
| ---                                                                                                                                | SEEG9184_RS14095             | SEN_RS06485             | same                        | unnamed             | Both ORFs intact           | HO protein                                                                                                        |
| ---                                                                                                                                | SEEG9184_RS14610             | ---                     | na                          | unnamed             | ORF intact                 | HO protein                                                                                                        |
| ---                                                                                                                                | SEEG9184_RS15540             | ---                     | na                          | unnamed             | ORF intact                 | HO protein                                                                                                        |
| ---                                                                                                                                | SEEG9184_RS19390             | ---                     | na                          | unnamed             | Both ORFs intact           | DUF3987 domain-containing protein                                                                                 |
| ---                                                                                                                                | SEEG9184_RS19405             | ---                     | na                          | unnamed             | Both ORFs intact           | HO protein                                                                                                        |
| ---                                                                                                                                | SEEG9184_RS21290             | SEN_RS22310             | same                        | unnamed             | Both ORFs intact           | AAA family ATPase                                                                                                 |
| ---                                                                                                                                | SEEG9184_RS21300             | SEN_RS22300             | same                        | unnamed             | Both ORFs intact           | restriction endonuclease subunit M                                                                                |
| ---                                                                                                                                | SEEG9184_RS21305_1,2,3,4     | SEN_RS22295_1,2,3,4     | same                        | unnamed             | Both ORFs intact           | N-6 DNA methylase                                                                                                 |
| ---                                                                                                                                | SEEG9184_RS21500_1,2_regulon | SEN_RS22090_1,2_regulon | (1) SEN 1 SNP sub, (2) same | unnamed             | na                         | AraC family transcriptional regulator                                                                             |
| ---                                                                                                                                | SEEG9184_RS21505             | SEN_RS22085             | SEEG 1 SNP del              | sefD                | SEEG pseudogene            | adhesin                                                                                                           |
| ---                                                                                                                                | SEEG9184_RS21510_1,2,3 (PS)  | SEN_RS22080_1,2,3       | same                        | sefC                | SEEG pseudogene            | outer membrane fimbrial user protein SefC, pseudo in SG, which has an extra A/T to make a 7mer                    |
| ---                                                                                                                                | SEEG9184_RS22845             | SEN_RS20760             | same                        | unnamed             | ORF intact                 | putative inner membrane protein                                                                                   |
| D. Genes of <i>S. Typhimurium</i> and <i>S. Enteritidis</i> with AT 8+mers but no homolog in <i>S. Gallinarum</i>                  |                              |                         |                             |                     |                            |                                                                                                                   |

|         |     |             |      |           |                  |                                                                                                                                             |
|---------|-----|-------------|------|-----------|------------------|---------------------------------------------------------------------------------------------------------------------------------------------|
| STM0870 | --- | SEN_RS04220 | same | unnamed   | Both ORFs intact | protein transporter: not in SEEG9184; see SG_RS04310                                                                                        |
| STM1054 | --- | SEN_RS23040 | same | unnamed   | SEN pseudogene   | Gifsy-2 prophage protein in STM: GC rich region has a deletion in in SEN due to 7bp insert in a guanine rich fragment, causing a frameshift |
| STM1666 | --- | SEN_RS07090 | same | unnamed   | STM pseudogene   | STM has in-frame stop following codon 24; SEN, hypothetical protein                                                                         |
| STM2065 | --- | SEN_RS10740 | same | phsA      | Both ORFs intact | thiosulfate reductase                                                                                                                       |
| STM3023 | --- | SEN_RS14920 | same | yohl/rcnR | Both ORFs intact | transcriptional regulator; Ni(ii)/Co(ii)-binding transcriptional repressor                                                                  |
| STM3034 | --- | SEN_RS14975 | same | vapB      | Both ORFs intact | toxin-antitoxin system antitoxin VapB                                                                                                       |

E. Genes of *S. Typhimurium* (STM), *S. Gallinarum* (SEEG), and *S. Enteritidis* with conserved AT 8+mers

|                 |                          |                     |      |                 |                      |                                                                                       |
|-----------------|--------------------------|---------------------|------|-----------------|----------------------|---------------------------------------------------------------------------------------|
| STM0004         | SEEG9184_RS20920         | SEN_RS00020         | same | thrC            | All ORFs intact      | threonine synthase                                                                    |
| STM0022         | SEEG9184_RS20830         | SEN_RS00110         | same | bcbf            | All ORFs intact      | fimbrial chaperone protein                                                            |
| STM0071         | SEEG9184_RS20580         | SEN_RS00360         | same | caic            | SEEG pseudogene      | crotonobetaine/carnitine-CoA ligase                                                   |
| STM0074         | SEEG9184_RS20565         | SEN_RS00375         | same | calT            | All ORFs intact      | L-carnitine:gamma-butyrobetaine antiporter                                            |
| STM0084         | SEEG9184_RS20510         | SEN_RS00430         | same | unnamed         | All ORFs intact      | phosphatase; sulfatase-like hydrolase/transferase                                     |
| STM0248         | SEEG9184_RS19625         | SEN_RS01280         | same | yaeD/gmhB       | All ORFs intact      | D-glycero-beta-D-manno-heptose 1,7-bisphosphate-7-phosphatase                         |
| STM0319         | SEEG9184_RS19215         | SEN_RS01550         | same | crI             | All ORFs intact      | sigma factor-binding protein; curli surface fiber csgA regulation                     |
| STM0333         | SEEG9184_RS19130         | SEN_RS01620         | same | unnamed         | All ORFs intact      | putative LysR family transcriptional regulator                                        |
| STM0359         | SEEG9184_RS23530         | SEN_RS01755         | same | unnamed         | All ORFs intact      | HO protein                                                                            |
| STM0397_regulon | SEEG9184_RS18805_regulon | SEN_RS01950_regulon | same | phoB-regulon    | na                   | phosphate response regulator transcription factor                                     |
| STM0437         | SEEG9184_RS18595         | SEN_RS02150         | same | unnamed         | All ORFs intact      | sel1 repeat family protein                                                            |
| STM0497         | SEEG9184_RS18275         | SEN_RS02445         | same | unnamed         | All ORFs intact      | HO protein                                                                            |
| STM0528         | SEEG9184_RS18125         | SEN_RS02595         | same | allD            | All ORFs intact      | ureidoglycolate dehydrogenase                                                         |
| STM0551         | SEEG9184_RS18005         | SEN_RS02710         | same | unnamed         | All ORFs intact      | diguanylate cyclase                                                                   |
| STM0626         | SEEG9184_RS17645         | SEN_RS03035         | same | dpiB            | All ORFs intact      | sensor histidine kinase                                                               |
| STM0664_regulon | SEEG9184_RS17450_regulon | SEN_RS03235_regulon | same | gltI-regulon    | na                   | glutamate/aspartate ABC transporter permease                                          |
| STM0756         | SEEG9184_RS17055         | SEN_RS03640         | same | nadA            | All ORFs intact      | quinolinate synthase                                                                  |
| STM0795         | SEEG9184_RS16855         | SEN_RS03835         | same | bioF            | All ORFs intact      | 8-amino-7-oxononanoate synthase                                                       |
| STM0810         | SEEG9184_RS16775         | SEN_RS03910         | same | unnamed         | All ORFs intact      | HO protein                                                                            |
| STM0827         | SEEG9184_RS16695         | SEN_RS03995         | same | ybiO            | All ORFs intact      | mechanosensitive channel protein                                                      |
| STM0858         | SEEG9184_RS16515         | SEN_RS04155         | same | unnamed         | SEEG pseudogene      | electron transfer flavoprotein-ubiquinone oxidoreductase                              |
| STM1062         | SEEG9184_RS16060         | SEN_RS04790         | same | uup             | All ORFs intact      | ABC transporter ATP-binding protein                                                   |
| STM1063         | SEEG9184_RS16055         | SEN_RS04795         | same | pqiA            | All ORFs intact      | paraquat-inducible protein A                                                          |
| STM1106         | SEEG9184_RS15840         | SEN_RS05015         | same | hpaI            | All ORFs intact      | 2,4-dihydroxyhept-2-ene-1,7-dioic acid aldolase                                       |
| STM1157         | SEEG9184_RS10755         | SEN_RS09830         | same | yclI            | All ORFs intact      | HO protein                                                                            |
| STM1163_regulon | SEEG9184_RS10790_regulon | SEN_RS09800_regulon | same | pyrC-regulon    | na                   | dihydrotolase                                                                         |
| STM1169         | SEEG9184_RS10820         | SEN_RS09770         | same | mvuM            | All ORFs intact      | virulence factor MvIM; Gfo/Idh/MocA family oxidoreductase                             |
| STM1224         | SEEG9184_RS11110         | SEN_RS09490         | same | sifA            | All ORFs intact      | replication in macrophages; SPI-2 type III secretion system effector SifA             |
| STM1363_regulon | SEEG9184_RS11875         | SEN_RS22750         | same | rprA-regulon    | na                   | regulatory RNA: anti-sense sRNA RprA                                                  |
| STM1392         | SEEG9184_RS12025         | SEN_RS08580         | same | ssrA            | All ORFs intact      | hybrid sensor histidine kinase/response;two component system sensor kinase            |
| STM1402         | SEEG9184_RS12080         | SEN_RS08530         | same | sseE            | All ORFs intact      | LcrR family type III secretion system chaperone                                       |
| STM1409         | SEEG9184_RS12115         | SEN_RS08495         | same | ssal            | All ORFs intact      | EscJ/YscJ/HrcJ family type III secretion inner membrane ring protein                  |
| STM1432_1,2     | SEEG9184_RS12225_1,2     | SEN_RS08380_1,2     | same | ydhO            | All ORFs intact      | putative cell wall-associated hydrolase;C40 family peptidase                          |
| STM1477         | SEEG9184_RS12450         | SEN_RS08155         | same | ydgi            | All ORFs intact      | putative amino acid transporter/permease                                              |
| STM1484         | SEEG9184_RS12495         | SEN_RS08120         | same | unnamed         | All ORFs intact      | serine protease                                                                       |
| STM1560         | SEEG9184_RS12850         | SEN_RS07750         | same | treZ/treY       | SEEG treY pseudogene | malto-oligosyltrehalose trehalohydrolase                                              |
| STM1630         | SEEG9184_RS13245         | SEN_RS07380         | same | unnamed         | All ORFs intact      | HO protein                                                                            |
| STM1716         | SEEG9184_RS13730         | SEN_RS06820         | same | sohB            | All ORFs intact      | protease                                                                              |
| STM1798         | SEEG9184_RS14165         | SEN_RS06415         | same | ycgR            | All ORFs intact      | flagellar brake protein                                                               |
| STM1813         | SEEG9184_RS14230         | SEN_RS06340         | same | ycgI            | All ORFs intact      | putative cytoplasmic protein                                                          |
| STM1854         | SEEG9184_RS23435         | SEN_RS06135         | same | unnamed         | All ORFs intact      | HO protein; membrane protein                                                          |
| STM1862         | SEEG9184_RS14495         | SEN_RS06085         | same | pagO            | All ORFs intact      | EamA/DMT family transporter (PAGO protein)                                            |
| STM1887         | SEEG9184_RS14940         | SEN_RS05795         | same | yebK            | All ORFs intact      | transcriptional regulator of HexR;MurR/RpiR family transcriptional regulator          |
| STM1889         | SEEG9184_RS14950         | SEN_RS05785         | same | lpxM            | All ORFs intact      | lauroyl-Kdo(2)-lipid IV(A) myristoyltransferase                                       |
| STM1940         | SEEG9184_RS15205         | SEN_RS05530         | same | unnamed         | All ORFs intact      | putative cell wall-associated hydrolase                                               |
| STM1963         | SEEG9184_RS15315         | SEN_RS05415         | same | amyA            | All ORFs intact      | cytoplasmic alpha-amylase                                                             |
| STM2020         | SEEG9184_RS23790         | SEN_RS10515         | same | cbiO            | SEEG pseudogene      | cobalt transport atp-binding protein CbiO: B12 synthesis associated?                  |
| STM2082         | SEEG9184_RS10050         | SEN_RS10825         | same | rfbP            | All ORFs intact      | UDP-phosphate galactose phosphotransferase;bifunctional enzyme; LPS side chain defect |
| STM2086         | SEEG9184_RS10030         | SEN_RS10845         | same | rfbU            | All ORFs intact      | mannosyl transferase                                                                  |
| STM2093         | SEEG9184_RS09990         | SEN_RS10885         | same | rfbI            | All ORFs intact      | CDP-6-deoxy-delta-3,4-glucoseen reductase; LPS                                        |
| STM2097         | SEEG9184_RS09970         | SEN_RS10905         | same | rfbB            | All ORFs intact      | dTDP-glucose 4,6-dehydratase                                                          |
| STM2112         | SEEG9184_RS09895         | SEN_RS10980         | same | wcaD            | All ORFs intact      | colanic acid polymerase WcaD                                                          |
| STM2113         | SEEG9184_RS09890         | SEN_RS10985         | same | wcaC            | All ORFs intact      | colanic acid biosynthesis glycosyltransferase                                         |
| STM2118         | SEEG9184_RS09865         | SEN_RS11010         | same | wza             | All ORFs intact      | polysaccharide exporter                                                               |
| STM2118_regulon | not annotated_regulon    | SEN_RS11010_regulon | same | STM2118-regulon | na                   | see STM2118                                                                           |
| STM2241         | SEEG9184_RS09260         | SEN_RS11570         | same | sspH2           | SEEG pseudogene      | E3 ubiquitin--protein ligase; induced by the SPI-2 regulatory ssrA/B                  |
| STM2245         | SEEG9184_RS09225         | SEN_RS11595         | same | unnamed         | All ORFs intact      | putative outer membrane protein                                                       |
| STM2273         | SEEG9184_RS09075         | SEN_RS11730         | same | unnamed         | All ORFs intact      | MR-MLE family protein: starvation sensing protein?                                    |
| STM2274         | SEEG9184_RS09070         | SEN_RS11735         | same | unnamed         | SEEG pseudogene      | MFS transporter                                                                       |
| STM2328         | SEEG9184_RS08795         | SEN_RS12005         | same | nuoA            | All ORFs intact      | NADH-quinone oxidoreductase subunit A                                                 |
| STM2386         | SEEG9184_RS08495         | SEN_RS12305         | same | smrB            | All ORFs intact      | endonuclease                                                                          |
| STM2397         | SEEG9184_RS08410         | SEN_RS12380         | same | pgtB            | All ORFs intact      | sensor histidine kinase                                                               |
| STM2403         | SEEG9184_RS08370         | SEN_RS12420         | same | glk             | All ORFs intact      | glucokinase                                                                           |
| STM2449         | SEEG9184_RS08135         | SEN_RS12660         | same | unnamed         | All ORFs intact      | putative acetyltransferase                                                            |
| STM2475         | SEEG9184_RS08005         | SEN_RS12780         | same | unnamed         | All ORFs intact      | HO protein                                                                            |
| STM2490         | SEEG9184_RS07925         | SEN_RS12855         | same | gcvR            | All ORFs intact      | transcriptional repressor of gcv operon                                               |
| STM2494         | SEEG9184_RS07895         | SEN_RS12885         | same | unnamed         | All ORFs intact      | HO protein                                                                            |
| STM2498_regulon | SEEG9184_RS07875         | SEN_RS12905         | same | upp-regulon     | na                   | uracil phosphoribosyltransferase                                                      |
| STM2691         | SEEG9184_RS07115         | SEN_RS13585         | same | unnamed         | SEEG pseudogene      | type I secretion system permease/ATPase: TolC family OMP                              |
| STM2782         | SEEG9184_RS07005         | SEN_RS13665         | same | mig-14          | All ORFs intact      | antimicrobial resistance protein Mig-14                                               |
| STM2819         | SEEG9184_RS06805         | SEN_RS13870         | same | yqaA/yqaB       | SEEG yqaB pseudogene | HO protein                                                                            |
| STM2862         | SEEG9184_RS06575         | SEN_RS14085         | same | sitB            | All ORFs intact      | manganese/iron transporter ATP-binding protein                                        |
| STM2878         | SEEG9184_RS06495         | SEN_RS14165         | same | sptP            | All ORFs intact      | pathogenicity island 1 effector protein StpP                                          |

|                 |                          |                     |      |                   |                     |                                                                                                             |
|-----------------|--------------------------|---------------------|------|-------------------|---------------------|-------------------------------------------------------------------------------------------------------------|
| STM2886         | SEEG9184_RS06455         | SEN_RS14205         | same | sicA              | All ORFs intact     | CesD/SycD/LcrH family type III secretion system chaperone: surface presentation of antigens                 |
| STM2897         | SEEG9184_RS06400         | SEN_RS14260         | same | invE              | All ORFs intact     | type III secretion system gatekeeper InvE                                                                   |
| STM2898         | SEEG9184_RS06395         | SEN_RS14265         | same | invG              | All ORFs intact     | type III secretion system outer membrane ring protein InvG                                                  |
| STM2932         | SEEG9184_RS06225         | SEN_RS14430         | same | ygbE              | All ORFs intact     | putative inner membrane protein                                                                             |
| STM2945         | SEEG9184_RS06150         | SEN_RS14495         | same | sopD              | All ORFs intact     | SPI-1 type III secretion system effector                                                                    |
| STM2966_regulon | SEEG9184_RS05995         | SEN_RS23740         | same | csrB-regulon      | na                  | regulatory RNA in LT2                                                                                       |
| STM3005         | SEEG9184_RS05790         | SEN_RS14830         | same | mutH              | All ORFs intact     | DNA mismatch repair endonuclease MutH                                                                       |
| STM3118         | SEEG9184_RS05225         | SEN_RS15405         | same | unnamed           | All ORFs intact     | putative acetyl-CoA hydrolase                                                                               |
| STM3121         | SEEG9184_RS05210         | SEN_RS15420         | same | unnamed           | All ORFs intact     | putative LysR family transcriptional regulator                                                              |
| STM3185         | SEEG9184_RS04880         | SEN_RS15745         | same | yqiE              | All ORFs intact     | ADP-ribose diphosphatase                                                                                    |
| STM3233         | SEEG9184_RS04620         | SEN_RS15990         | same | yqiG              | All ORFs intact     | glutathione-dependent reductase                                                                             |
| STM3274         | SEEG9184_RS04430         | SEN_RS16165         | same | yhbU              | All ORFs intact     | putative protease                                                                                           |
| STM3311         | SEEG9184_RS04240         | SEN_RS16355         | same | yrbD/mlaD         | All ORFs intact     | outer membrane lipid asymmetry maintenance protein MlaD                                                     |
| STM3328         | SEEG9184_RS04150         | SEN_RS16440         | same | arcB              | All ORFs intact     | two-component sensor histidine kinase; senses redox conditions                                              |
| STM3480         | SEEG9184_RS01850         | SEN_RS17205         | same | yhfL              | All ORFs intact     | DUF4223 domain-containing protein                                                                           |
| STM3484         | SEEG9184_RS01830         | SEN_RS17225         | same | dam               | All ORFs intact     | DNA adenine methylase                                                                                       |
| STM3515_regulon | SEEG9184_RS01665_regulon | SEN_RS17380_regulon | same | malT-regulon      | na                  | transcriptional regulator                                                                                   |
| STM3658         | SEEG9184_RS00930         | SEN_RS18105         | same | yiaH              | SEEG pseudogene     | acetyltransferase                                                                                           |
| STM3691         | SEEG9184_RS00750         | SEN_RS18275         | same | sadA              | All ORFs intact     | trimeric autotransporter adhesin; SEEG has 42 bp deletion, no AT 8+mer involved                             |
| STM3697_regulon | SEEG9184_RS00715_regulon | SEN_RS18305_regulon | same | unnamed           | na                  | RBS for mandelate racemase/muconate lactonizing protein                                                     |
| STM3794         | SEEG9184_RS00245         | SEN_RS18745         | same | tsx, nupG E. coli | All ORFs intact     | DeoR family transcriptional regulator                                                                       |
| STM3806         | bp37560-37846            | bp3881833-3882117   | same | unnamed           | All pseudogenes     | not annotated in SEN or SEEG; pseudogene in STM; frameshift                                                 |
| STM3825         | SEEG9184_RS00075         | SEN_RS18905         | same | torT              | All ORFs intact     | TMAO reductase system periplasmic protein                                                                   |
| STM3914         | SEEG9184_RS03405         | SEN_RS19330         | same | rhIB              | All ORFs intact     | ATP-dependent RNA helicase RhIB                                                                             |
| STM4039         | SEEG9184_RS23265         | SEN_RS24515         | same | unnamed           | EN, SEEG pseudogene | HO protein                                                                                                  |
| STM4076         | SEEG9184_RS02975         | SEN_RS20130         | same | ydeZ/lsrD         | All ORFs intact     | putative sugar transport protein                                                                            |
| STM4086         | SEEG9184_RS03025         | SEN_RS20180         | same | glpK              | All ORFs intact     | glycerol kinase                                                                                             |
| STM4196         | SEEG9184_RS22850         | SEN_RS20755         | same | unnamed           | All ORFs intact     | HO protein                                                                                                  |
| STM4260         | SEEG9184_RS22640         | SEN_RS20975         | same | unnamed           | All ORFs intact     | predicted cation efflux pump; HLYD secretioncation transporter                                              |
| STM4266         | SEEG9184_RS22610         | SEN_RS21005         | same | soxR              | All ORFs intact     | redox-sensitive transcriptional activator SoxR: contains iron-sulfur center for redox-sensing (MerR family) |
| STM4314         | SEEG9184_RS22360         | SEN_RS21255         | same | unnamed           | All ORFs intact     | putative luxR family bacterial regulatory                                                                   |
| STM4401         | SEEG9184_RS21915         | SEN_RS21705         | same | ytfG              | All ORFs intact     | NAD(P)-dependent oxidoreductase                                                                             |
| STM4485         | SEEG9184_RS21575         | SEN_RS22030         | same | idnK              | All ORFs intact     | gluconate kinase                                                                                            |
| STM4585         | SEEG9184_RS21020         | SEN_RS22580         | same | gpmB              | All ORFs intact     | phosphoglycerate mutase                                                                                     |
| STM4585_regulon | SEEG9184_RS21020_regulon | SEN_RS22580_regulon | same | gpmB              | na                  | phosphoglycerate mutase regulon                                                                             |
| STM4600         | SEEG9184_RS20940         | SEN_RS22655         | same | lasT              | All ORFs intact     | tRNA/rRNA methyltransferase                                                                                 |

<sup>1</sup>Results are from comparing 3 genomes, namely S. Typhimurium NC\_003197.2 (STM), S. Enteritidis NC\_011294.1 (SEN), and S. Gallinarum CP019035.1 (SEEG).

<sup>2</sup>Genes of STM that vary in AT 8+mer sequences as compared to SEEG and SEN are listed in both sections A and B.

<sup>3</sup>Abbreviations: na, not applicable; ORF, open reading frame.
