# Supplementary material
Source: Preprints.org preprint supplement (doi:10.20944/preprints202106.0384.v2)
Supplement: Supplementary file 6 [file supplementary]

TABLE S2. Location and classification of AT 8+mers in *S. enterica* Typhimurium LT2

| Category of AT 8+mer | Start of AT 8+mer | End of AT 8+mer | Length | Direction | Distance between start of AT 8+mers |
|----------------------|-------------------|-----------------|--------|-----------|-------------------------------------|
| intergenic           | 303               | 310             | 8      | reverse   |                                     |
| STM0004              | 3819              | 3826            | 8      | reverse   | 3516                                |
| intergenic           | 11498             | 11505           | 8      | forward   | 7679                                |
| STM0022              | 25115             | 25122           | 8      | forward   | 13617                               |
| STM0071              | 82574             | 82581           | 8      | reverse   | 57459                               |
| STM0074              | 88156             | 88163           | 8      | forward   | 5582                                |
| STM0084              | 95968             | 95975           | 8      | forward   | 7812                                |
| intergenic           | 100814            | 100821          | 8      | reverse   | 4846                                |
| intergenic           | 138203            | 138210          | 8      | reverse   | 37389                               |
| intergenic           | 173265            | 173272          | 8      | reverse   | 35062                               |
| intergenic           | 209196            | 209203          | 8      | reverse   | 35931                               |
| intergenic           | 229717            | 229724          | 8      | forward   | 20521                               |
| intergenic           | 230227            | 230234          | 8      | forward   | 510                                 |
| intergenic           | 230254            | 230261          | 8      | reverse   | 27                                  |
| intergenic           | 237151            | 237159          | 9      | forward   | 6897                                |
| STM0212              | 248073            | 248080          | 8      | reverse   | 10921                               |
| STM0229              | 268114            | 268122          | 9      | forward   | 20041                               |
| intergenic           | 274048            | 274055          | 8      | reverse   | 5933                                |
| STM0248              | 288370            | 288377          | 8      | forward   | 14322                               |
| intergenic           | 304384            | 304391          | 8      | forward   | 16014                               |
| intergenic           | 304417            | 304424          | 8      | reverse   | 33                                  |
| STM0290              | 332273            | 332280          | 8      | forward   | 27856                               |
| STM0319              | 364624            | 364632          | 9      | reverse   | 32351                               |
| STM0333              | 376854            | 376861          | 8      | reverse   | 12229                               |
| STM0341              | 385921            | 385928          | 8      | forward   | 9067                                |
| STM0359              | 408637            | 408644          | 8      | forward   | 22716                               |
| intergenic           | 417817            | 417825          | 9      | reverse   | 9180                                |
| STM0397-regulon      | 450719            | 450727          | 9      | reverse   | 32901                               |
| STM0437              | 490762            | 490769          | 8      | reverse   | 40042                               |
| intergenic           | 503022            | 503029          | 8      | reverse   | 12260                               |
| intergenic           | 515088            | 515095          | 8      | reverse   | 12066                               |
| STM0497              | 557229            | 557236          | 8      | reverse   | 42141                               |
| intergenic           | 580065            | 580072          | 8      | reverse   | 22836                               |
| STM0528              | 590722            | 590729          | 8      | reverse   | 10657                               |
| STM0551              | 612356            | 612363          | 8      | forward   | 21634                               |
| STM0555              | 614167            | 614174          | 8      | reverse   | 1811                                |
| STM0558              | 616481            | 616488          | 8      | reverse   | 2314                                |
| intergenic           | 621689            | 621696          | 8      | reverse   | 5208                                |
| STM0626-regulon      | 689650            | 689657          | 8      | forward   | 67961                               |
| intergenic           | 693173            | 693180          | 8      | reverse   | 3523                                |
| intergenic           | 694829            | 694836          | 8      | reverse   | 1656                                |
| intergenic           | 698315            | 698322          | 8      | forward   | 3486                                |
| STM0649              | 712001            | 712008          | 8      | forward   | 13686                               |

|                 |                |                |          |                |              |
|-----------------|----------------|----------------|----------|----------------|--------------|
| STM0664-regulon | 728765         | 728772         | 8        | forward        | 16764        |
| intergenic      | 747296         | 747303         | 8        | reverse        | 18531        |
| STM0720         | 785218         | 785225         | 8        | forward        | 37922        |
| STM0722         | 787718         | 787725         | 8        | reverse        | 1439         |
| STM0723         | 788256         | 788263         | 8        | forward        | 538          |
| STM0756         | 820877         | 820884         | 8        | forward        | 32621        |
| intergenic      | 823058         | 823065         | 8        | reverse        | 2181         |
| STM0795         | 861570         | 861577         | 8        | forward        | 38512        |
| intergenic      | 863944         | 863952         | 9        | reverse        | 2374         |
| intergenic      | 866685         | 866692         | 8        | forward        | 2740         |
| intergenic      | 874135         | 874142         | 8        | reverse        | 7450         |
| STM0810         | 875698         | 875705         | 8        | forward        | 1563         |
| STM0827         | 894495         | 894502         | 8        | reverse        | 18797        |
| intergenic      | 899265         | 899272         | 8        | forward        | 4770         |
| intergenic      | 900093         | 900100         | 8        | reverse        | 828          |
| STM0858         | 931603         | 931610         | 8        | forward        | 31510        |
| STM0870         | 944140         | 944147         | 8        | forward        | 12537        |
| intergenic      | 976389         | 976396         | 8        | forward        | 32249        |
| intergenic      | 992874         | 992882         | 9        | reverse        | 16485        |
| STM0929         | 1004180        | 1004187        | 8        | reverse        | 11305        |
| intergenic      | 1005279        | 1005286        | 8        | forward        | 1099         |
| intergenic      | 1027405        | 1027412        | 8        | forward        | 22126        |
| intergenic      | 1091439        | 1091446        | 8        | forward        | 64034        |
| STM1006         | 1099593        | 1099600        | 8        | reverse        | 8154         |
| STM1023         | 1112426        | 1112433        | 8        | reverse        | 12833        |
| STM1054         | 1142433        | 1142440        | 8        | forward        | 30007        |
| STM1062         | 1153616        | 1153623        | 8        | forward        | 11183        |
| STM1063         | 1154307        | 1154314        | 8        | forward        | 691          |
| intergenic      | 1162292        | 1162299        | 8        | forward        | 7985         |
| intergenic      | 1162330        | 1162337        | 8        | forward        | 38           |
| STM1106         | 1193918        | 1193925        | 8        | forward        | 31588        |
| STM1107-regulon | 1194017        | 1194024        | 8        | forward        | 99           |
| STM1130         | 1219764        | 1219771        | 8        | forward        | 25747        |
| STM1135         | 1224894        | 1224901        | 8        | forward        | 5130         |
| intergenic      | 1230786        | 1230793        | 8        | forward        | 5892         |
| intergenic      | 1232116        | 1232123        | 8        | reverse        | 1330         |
| STM1157         | 1245414        | 1245421        | 8        | reverse        | 13298        |
| STM1163-regulon | 1249624        | 1249631        | 8        | forward        | 4210         |
| STM1169         | 1254099        | 1254106        | 8        | forward        | 3900         |
| intergenic      | 1296516        | 1296523        | 8        | reverse        | 42417        |
| STM1224         | 1310635        | 1310642        | 8        | forward        | 14119        |
| STM1240         | 1327591        | 1327598        | 8        | reverse        | 16956        |
| STM1240         | 1327665        | 1327672        | 8        | reverse        | 74           |
| STM1240         | 1327695        | 1327702        | 8        | forward        | 30           |
| intergenic      | 1363853        | 1363860        | 8        | forward        | 36158        |
| intergenic      | 1368633        | 1368640        | 8        | forward        | 4780         |
| STM1363_regulon | <b>1444823</b> | <b>1444831</b> | <b>9</b> | <b>forward</b> | <b>76190</b> |
| intergenic      | 1450354        | 1450361        | 8        | forward        | 5530         |
| intergenic      | 1459323        | 1459330        | 8        | forward        | 8969         |
| intergenic      | 1475189        | 1475196        | 8        | reverse        | 15866        |
| STM1392         | 1477236        | 1477243        | 8        | reverse        | 2047         |
| STM1402         | 1487337        | 1487344        | 8        | forward        | 10101        |
| STM1409         | 1490407        | 1490414        | 8        | forward        | 3070         |

|            |         |         |    |         |       |
|------------|---------|---------|----|---------|-------|
| STM1432    | 1510741 | 1510748 | 8  | reverse | 20334 |
| STM1432    | 1510752 | 1510759 | 8  | reverse | 11    |
| intergenic | 1526387 | 1526395 | 9  | forward | 15635 |
| intergenic | 1535951 | 1535958 | 8  | reverse | 9563  |
| STM1477    | 1553907 | 1553914 | 8  | reverse | 17956 |
| STM1484    | 1561666 | 1561673 | 8  | forward | 7759  |
| intergenic | 1587885 | 1587892 | 8  | reverse | 26219 |
| intergenic | 1593975 | 1593984 | 10 | reverse | 6090  |
| intergenic | 1604045 | 1604052 | 8  | reverse | 10068 |
| STM1550    | 1626757 | 1626764 | 8  | reverse | 22712 |
| STM1554    | 1630624 | 1630631 | 8  | reverse | 3867  |
| STM1560    | 1641163 | 1641170 | 8  | forward | 10539 |
| STM1602    | 1692279 | 1692286 | 8  | reverse | 51116 |
| STM1630    | 1720502 | 1720509 | 8  | forward | 28223 |
| intergenic | 1749925 | 1749932 | 8  | forward | 29423 |
| STM1666    | 1759274 | 1759281 | 8  | forward | 9349  |
| STM1670    | 1763943 | 1763950 | 8  | reverse | 4669  |
| STM1698    | 1791330 | 1791337 | 8  | reverse | 27387 |
| STM1716    | 1813896 | 1813903 | 8  | reverse | 22566 |
| intergenic | 1814270 | 1814277 | 8  | forward | 374   |
| intergenic | 1818514 | 1818521 | 8  | reverse | 4244  |
| intergenic | 1847730 | 1847737 | 8  | reverse | 29216 |
| intergenic | 1862495 | 1862502 | 8  | forward | 14765 |
| STM1798    | 1897289 | 1897296 | 8  | forward | 34794 |
| intergenic | 1909061 | 1909068 | 8  | reverse | 11772 |
| STM1813    | 1911893 | 1911900 | 8  | reverse | 2832  |
| intergenic | 1915168 | 1915175 | 8  | forward | 3275  |
| intergenic | 1937638 | 1937645 | 8  | reverse | 22470 |
| intergenic | 1941093 | 1941101 | 9  | forward | 3455  |
| STM1854    | 1951706 | 1951713 | 8  | reverse | 10612 |
| intergenic | 1952885 | 1952892 | 8  | reverse | 1179  |
| STM1862    | 1959668 | 1959675 | 8  | forward | 6783  |
| STM1869    | 1965921 | 1965928 | 8  | reverse | 6253  |
| intergenic | 1981357 | 1981364 | 8  | forward | 15436 |
| STM1887    | 1981864 | 1981871 | 8  | forward | 507   |
| STM1889    | 1984944 | 1984951 | 8  | reverse | 3080  |
| intergenic | 2021075 | 2021082 | 8  | forward | 36131 |
| STM1939    | 2032731 | 2032738 | 8  | reverse | 11656 |
| STM1940    | 2034236 | 2034243 | 8  | reverse | 1505  |
| STM1941    | 2034981 | 2034988 | 8  | forward | 745   |
| STM1963    | 2051934 | 2051941 | 8  | forward | 16953 |
| intergenic | 2077259 | 2077266 | 8  | reverse | 25325 |
| STM2020    | 2101583 | 2101590 | 8  | reverse | 24324 |
| STM2065    | 2139855 | 2139862 | 8  | reverse | 38272 |
| intergenic | 2149557 | 2149565 | 9  | reverse | 9702  |
| intergenic | 2159312 | 2159319 | 8  | forward | 9754  |
| STM2082    | 2162284 | 2162291 | 8  | forward | 2972  |
| STM2086    | 2166754 | 2166761 | 8  | reverse | 4470  |
| STM2088    | 2169612 | 2169619 | 8  | forward | 2858  |
| STM2090    | 2172027 | 2172034 | 8  | reverse | 2415  |
| STM2093    | 2174824 | 2174831 | 8  | reverse | 2797  |
| STM2097    | 2178207 | 2178214 | 8  | reverse | 3383  |
| STM2100    | 2181955 | 2181962 | 8  | reverse | 3748  |

|                 |                |                |          |                |               |
|-----------------|----------------|----------------|----------|----------------|---------------|
| STM2112         | 2195935        | 2195942        | 8        | forward        | 13980         |
| STM2113         | 2197346        | 2197353        | 8        | reverse        | 1411          |
| STM2118-regulon | 2202762        | 2202769        | 8        | forward        | 5416          |
| STM2129         | 2222458        | 2222465        | 8        | forward        | 19696         |
| STM2134         | 2226782        | 2226789        | 8        | forward        | 4324          |
| STM2137         | 2232015        | 2232022        | 8        | forward        | 5233          |
| intergenic      | 2298569        | 2298576        | 8        | forward        | 66554         |
| intergenic      | 2328601        | 2328608        | 8        | forward        | 30032         |
| STM2241         | 2341488        | 2341495        | 8        | forward        | 12887         |
| intergenic      | 2343861        | 2343868        | 8        | reverse        | 2373          |
| STM2245         | 2345894        | 2345901        | 8        | forward        | 2033          |
| STM2268-regulon | 2366997        | 2367004        | 8        | reverse        | 21103         |
| STM2273         | 2377913        | 2377920        | 8        | reverse        | 10916         |
| STM2274         | 2378993        | 2379000        | 8        | forward        | 1080          |
| STM2238         | 2439576        | 2439583        | 8        | forward        | 58441         |
| STM2386         | 2497010        | 2497017        | 8        | forward        | 57434         |
| STM2397         | 2509762        | 2509769        | 8        | reverse        | 12752         |
| STM2403         | 2518663        | 2518670        | 8        | reverse        | 8901          |
| STM2449         | 2559838        | 2559845        | 8        | reverse        | 41175         |
| STM2475         | 2585641        | 2585648        | 8        | reverse        | 25803         |
| STM2490         | 2605014        | 2605021        | 8        | reverse        | 17933         |
| intergenic      | 2606589        | 2606596        | 8        | forward        | 1575          |
| STM2494         | 2607985        | 2607992        | 8        | forward        | 1396          |
| intergenic      | 2611987        | 2611994        | 8        | forward        | 4002          |
| STM2498         | 2612693        | 2612700        | 8        | forward        | 706           |
| intergenic      | 2612956        | 2612963        | 8        | forward        | 263           |
| STM2584         | <b>2730097</b> | <b>2730104</b> | <b>8</b> | <b>reverse</b> | <b>117141</b> |
| STM2592         | 2742731        | 2742738        | 8        | forward        | 12634         |
| STM2609         | 2758016        | 2758024        | 9        | reverse        | 15285         |
| intergenic      | 2802005        | 2802012        | 8        | forward        | 43988         |
| intergenic      | 2826350        | 2826357        | 8        | forward        | 24345         |
| STM2691         | 2841501        | 2841508        | 8        | forward        | 15151         |
| STM2706         | 2854470        | 2854477        | 8        | reverse        | 12969         |
| intergenic      | 2885676        | 2885683        | 8        | forward        | 31206         |
| intergenic      | 2888236        | 2888244        | 9        | forward        | 2560          |
| intergenic      | 2888289        | 2888296        | 8        | forward        | 52            |
| STM2754         | 2892589        | 2892596        | 8        | forward        | 4300          |
| STM2766         | 2908226        | 2908233        | 8        | reverse        | 15637         |
| intergenic      | 2910508        | 2910515        | 8        | forward        | 2282          |
| STM2782         | 2930398        | 2930405        | 8        | forward        | 19890         |
| STM2819         | 2968642        | 2968649        | 8        | forward        | 38244         |
| STM2862         | 3007511        | 3007518        | 8        | forward        | 38869         |
| STM2878         | 3022893        | 3022900        | 8        | reverse        | 15382         |
| STM2886         | 3031073        | 3031080        | 8        | forward        | 8180          |
| STM2897         | 3041386        | 3041393        | 8        | reverse        | 10313         |
| STM2898         | 3043091        | 3043098        | 8        | reverse        | 1705          |
| intergenic      | 3044283        | 3044290        | 8        | reverse        | 1192          |
| STM2902         | 3045870        | 3045877        | 8        | forward        | 1587          |
| intergenic      | 3065455        | 3065462        | 8        | forward        | 19585         |
| STM2932         | 3072146        | 3072153        | 8        | forward        | 6691          |
| intergenic      | 3086949        | 3086956        | 8        | forward        | 14803         |
| STM2945         | 3088003        | 3088010        | 8        | forward        | 1054          |
| intergenic      | 3095426        | 3095433        | 8        | reverse        | 7423          |

|            |         |         |    |         |       |
|------------|---------|---------|----|---------|-------|
| intergenic | 3101710 | 3101718 | 9  | forward | 6284  |
| STM2966    | 3116704 | 3116711 | 8  | forward | 14993 |
| intergenic | 3135521 | 3135528 | 8  | reverse | 18817 |
| intergenic | 3157974 | 3157981 | 8  | forward | 22453 |
| STM3005    | 3164026 | 3164033 | 8  | forward | 6052  |
| intergenic | 3170128 | 3170135 | 8  | forward | 6102  |
| intergenic | 3170329 | 3170337 | 9  | forward | 201   |
| STM3022    | 3183503 | 3183510 | 8  | forward | 13173 |
| STM3023    | 3183980 | 3183987 | 8  | reverse | 477   |
| STM3034    | 3195767 | 3195774 | 8  | forward | 11787 |
| intergenic | 3224585 | 3224592 | 8  | forward | 28818 |
| STM3118    | 3276846 | 3276853 | 8  | reverse | 52261 |
| STM3121    | 3280240 | 3280247 | 8  | reverse | 3394  |
| intergenic | 3317570 | 3317577 | 8  | reverse | 37330 |
| STM3185    | 3348286 | 3348293 | 8  | forward | 30716 |
| intergenic | 3362464 | 3362471 | 8  | forward | 14178 |
| intergenic | 3392257 | 3392268 | 12 | reverse | 29793 |
| STM3233    | 3398919 | 3398926 | 8  | forward | 6658  |
| intergenic | 3404719 | 3404726 | 8  | reverse | 5800  |
| STM3274    | 3440410 | 3440417 | 8  | forward | 35691 |
| intergenic | 3461720 | 3461727 | 8  | forward | 21310 |
| intergenic | 3473219 | 3473226 | 8  | forward | 11499 |
| STM3311    | 3478142 | 3478149 | 8  | reverse | 4923  |
| STM3328    | 3490502 | 3490509 | 8  | reverse | 12360 |
| intergenic | 3501757 | 3501764 | 8  | forward | 11255 |
| intergenic | 3560947 | 3560955 | 9  | reverse | 59190 |
| intergenic | 3597913 | 3597920 | 8  | forward | 36965 |
| STM3452    | 3604603 | 3604610 | 8  | forward | 6690  |
| intergenic | 3604838 | 3604845 | 8  | forward | 235   |
| intergenic | 3626427 | 3626434 | 8  | reverse | 21589 |
| STM3480    | 3636018 | 3636025 | 8  | forward | 9591  |
| STM3484    | 3639524 | 3639531 | 8  | reverse | 3506  |
| STM3515    | 3676865 | 3676872 | 8  | forward | 37341 |
| intergenic | 3715413 | 3715421 | 9  | forward | 38548 |
| intergenic | 3715555 | 3715562 | 8  | forward | 141   |
| intergenic | 3716294 | 3716302 | 9  | reverse | 739   |
| intergenic | 3727793 | 3727800 | 8  | forward | 11498 |
| intergenic | 3733712 | 3733719 | 8  | forward | 5919  |
| intergenic | 3774475 | 3774482 | 8  | forward | 40763 |
| STM3638    | 3826424 | 3826432 | 9  | reverse | 51949 |
| intergenic | 3828296 | 3828303 | 8  | forward | 1871  |
| intergenic | 3836708 | 3836715 | 8  | reverse | 8412  |
| STM3658    | 3843569 | 3843576 | 8  | reverse | 6861  |
| STM3674    | 3861984 | 3861991 | 8  | reverse | 18415 |
| intergenic | 3880285 | 3880292 | 8  | forward | 18301 |
| STM3691    | 3881321 | 3881328 | 8  | forward | 1036  |
| STM3697    | 3891460 | 3891467 | 8  | forward | 10139 |
| intergenic | 3897443 | 3897450 | 8  | forward | 5983  |
| intergenic | 3910767 | 3910774 | 8  | forward | 13324 |
| intergenic | 3926659 | 3926666 | 8  | forward | 15892 |
| intergenic | 3991176 | 3991183 | 8  | forward | 64517 |
| STM3794    | 3995143 | 3995150 | 8  | reverse | 3967  |
| STM3806    | 4007348 | 4007355 | 8  | forward | 12205 |

|                 |                |                |          |                |              |
|-----------------|----------------|----------------|----------|----------------|--------------|
| intergenic      | 4010490        | 4010497        | 8        | reverse        | 3142         |
| STM3825         | 4026356        | 4026363        | 8        | forward        | 15866        |
| intergenic      | 4073634        | 4073642        | 9        | forward        | 47278        |
| intergenic      | 4081158        | 4081165        | 8        | reverse        | 7523         |
| intergenic      | 4081169        | 4081176        | 8        | reverse        | 11           |
| intergenic      | 4095558        | 4095565        | 8        | forward        | 14389        |
| intergenic      | 4105484        | 4105492        | 9        | reverse        | 9926         |
| intergenic      | 4108895        | 4108902        | 8        | reverse        | 3410         |
| STM3914         | 4124625        | 4124632        | 8        | reverse        | 15730        |
| intergenic      | <b>4209022</b> | <b>4209029</b> | <b>8</b> | <b>forward</b> | <b>84397</b> |
| STM4039         | 4250074        | 4250081        | 8        | reverse        | 41052        |
| intergenic      | 4250202        | 4250209        | 8        | forward        | 128          |
| intergenic      | 4263304        | 4263311        | 8        | reverse        | 13102        |
| intergenic      | 4271167        | 4271174        | 8        | reverse        | 7863         |
| STM4076         | 4286594        | 4286601        | 8        | reverse        | 15427        |
| STM4086         | 4295849        | 4295856        | 8        | reverse        | 9255         |
| intergenic      | 4306000        | 4306007        | 8        | forward        | 10151        |
| intergenic      | 4342879        | 4342887        | 9        | forward        | 36879        |
| STM4196         | <b>4418289</b> | <b>4418297</b> | <b>9</b> | <b>reverse</b> | <b>75409</b> |
| STM4260         | 4481627        | 4481634        | 8        | forward        | 63337        |
| intergenic      | 4502109        | 4502116        | 8        | reverse        | 20482        |
| STM4266-regulon | 4504400        | 4504407        | 8        | forward        | 2291         |
| intergenic      | 4506004        | 4506011        | 8        | reverse        | 1604         |
| intergenic      | 4538693        | 4538700        | 8        | forward        | 32689        |
| STM4314         | 4560794        | 4560801        | 8        | reverse        | 22101        |
| intergenic      | 4561971        | 4561978        | 8        | forward        | 1177         |
| intergenic      | 4574663        | 4574670        | 8        | reverse        | 12692        |
| STM4351         | 4596149        | 4596157        | 9        | reverse        | 21486        |
| intergenic      | 4614384        | 4614392        | 9        | reverse        | 18234        |
| STM4401         | 4638395        | 4638402        | 8        | reverse        | 24010        |
| intergenic      | 4643638        | 4643646        | 9        | forward        | 5243         |
| STM4435         | 4679637        | 4679644        | 8        | forward        | 35998        |
| intergenic      | 4704946        | 4704954        | 9        | forward        | 25309        |
| STM4485         | 4729445        | 4729452        | 8        | forward        | 24498        |
| STM4495         | 4744842        | 4744849        | 8        | reverse        | 15397        |
| STM4524         | 4778396        | 4778403        | 8        | reverse        | 1611         |
| STM4585-regulon | 4842031        | 4842038        | 8        | forward        | 63635        |
| intergenic      | 4843637        | 4843644        | 8        | reverse        | 1606         |
| STM4600         | 4857407        | 4857414        | 8        | forward        | 13770        |

---

|                                 |            |
|---------------------------------|------------|
| average distance between starts | 16,450.2   |
| STDev                           | 17,325.3   |
| range                           | 11-117,141 |
| median                          | 11,498.0   |
| number                          | 294        |
| intergenic                      | 131        |
| genes                           | 153        |
| regulons                        | 10         |
